# Supplementary figures and images for: Culturing-Enriched Metabarcoding Analysis of the Oryctes rhinoceros Gut Microbiome
Source: MDPI journal article supplement (doi:10.3390/insects11110782), 2020-11-11

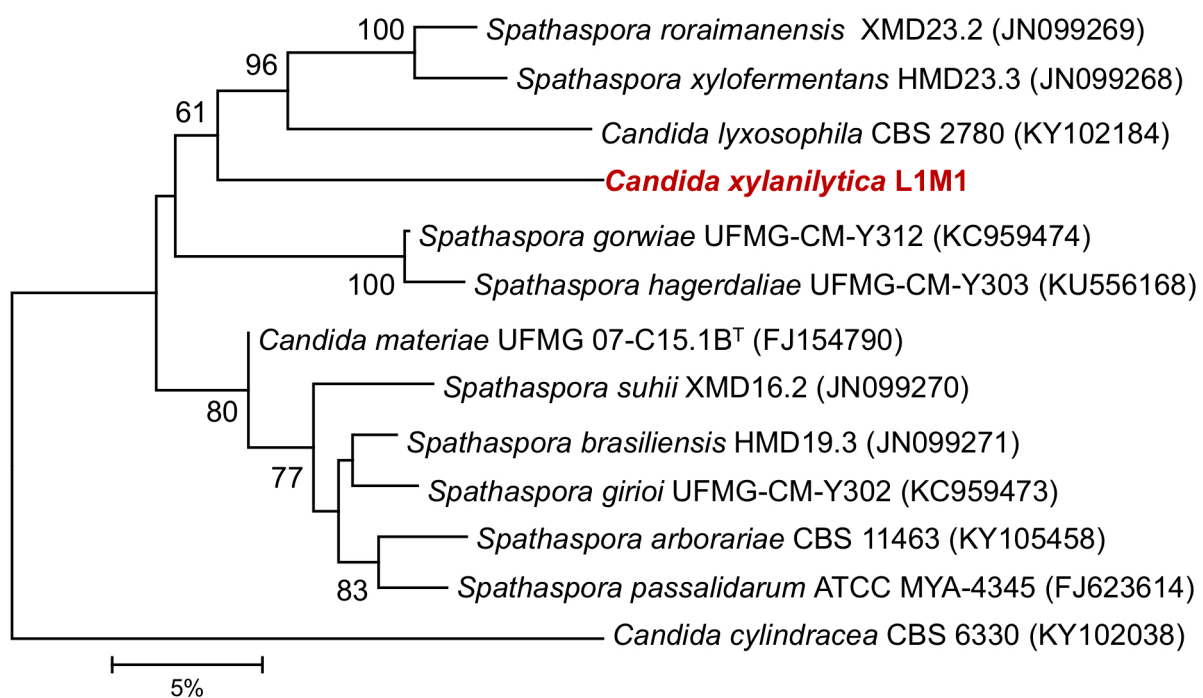

Supplement: s1 [file s1]

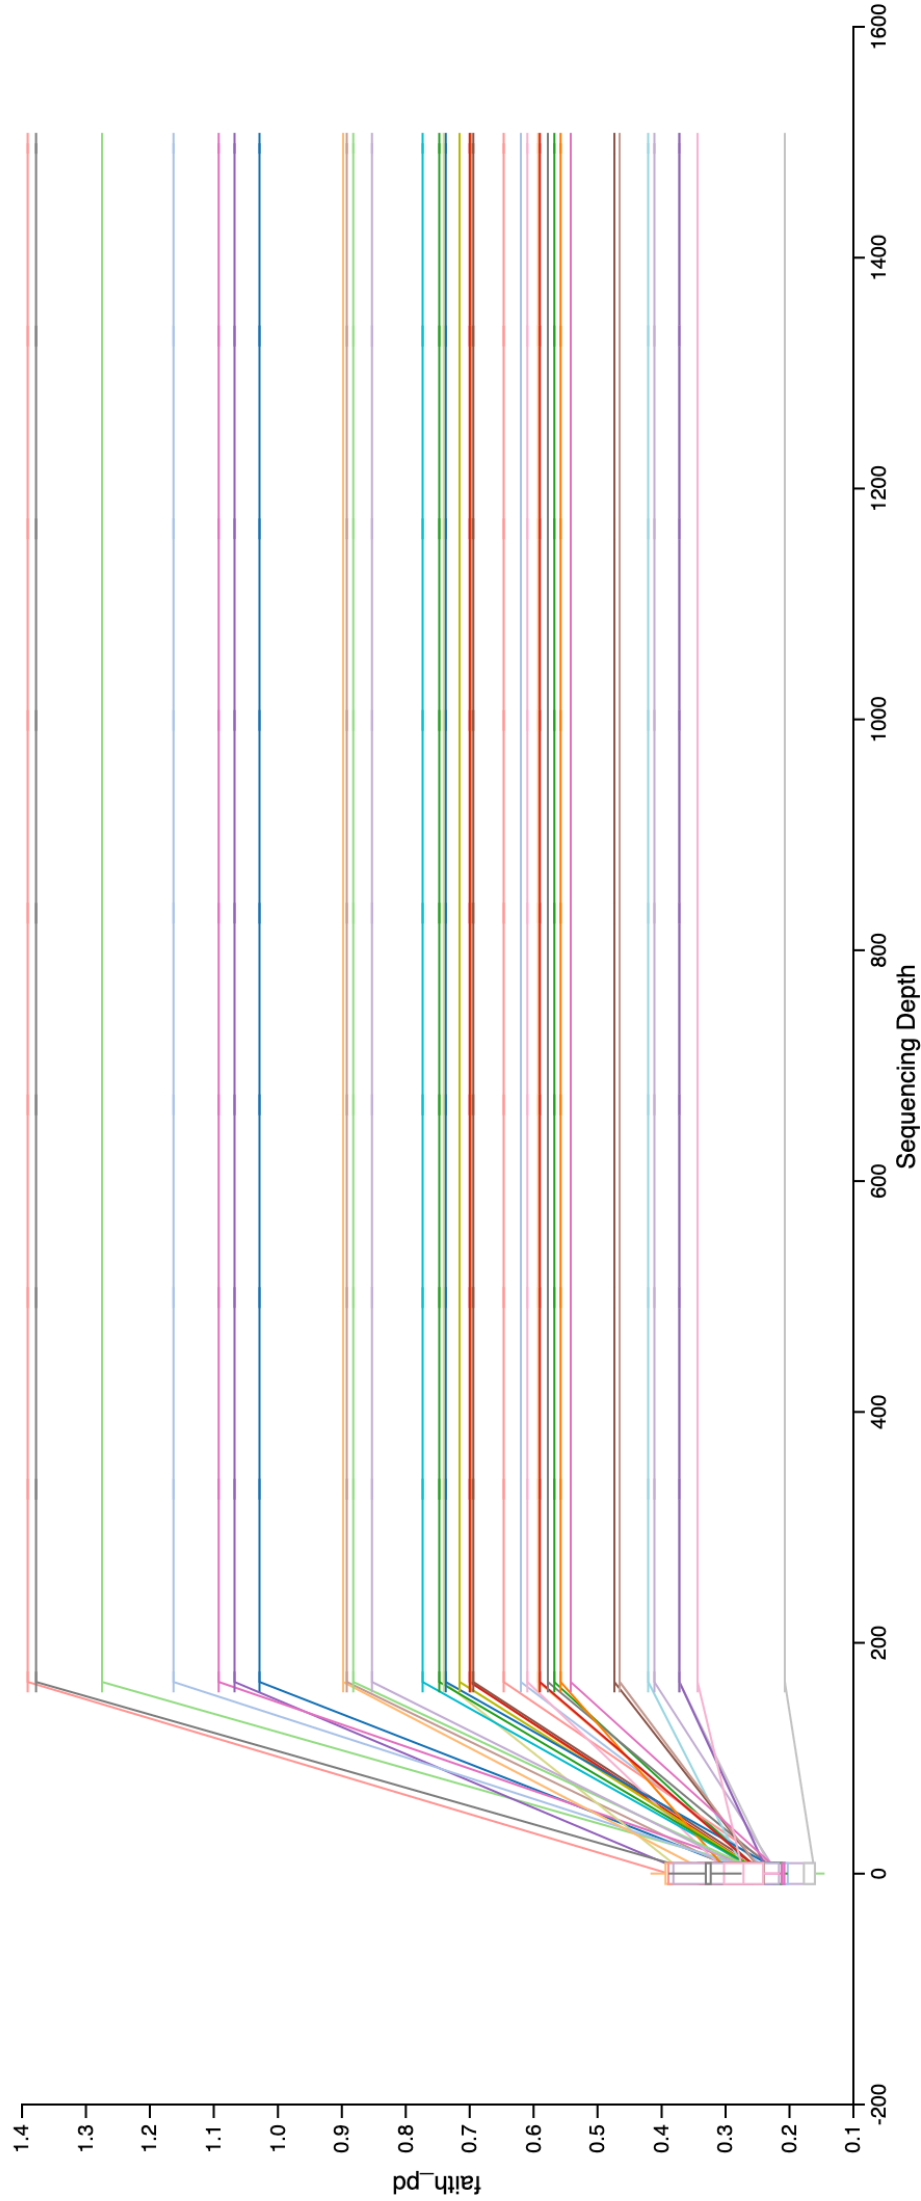

Supplement: s1 [file s1]

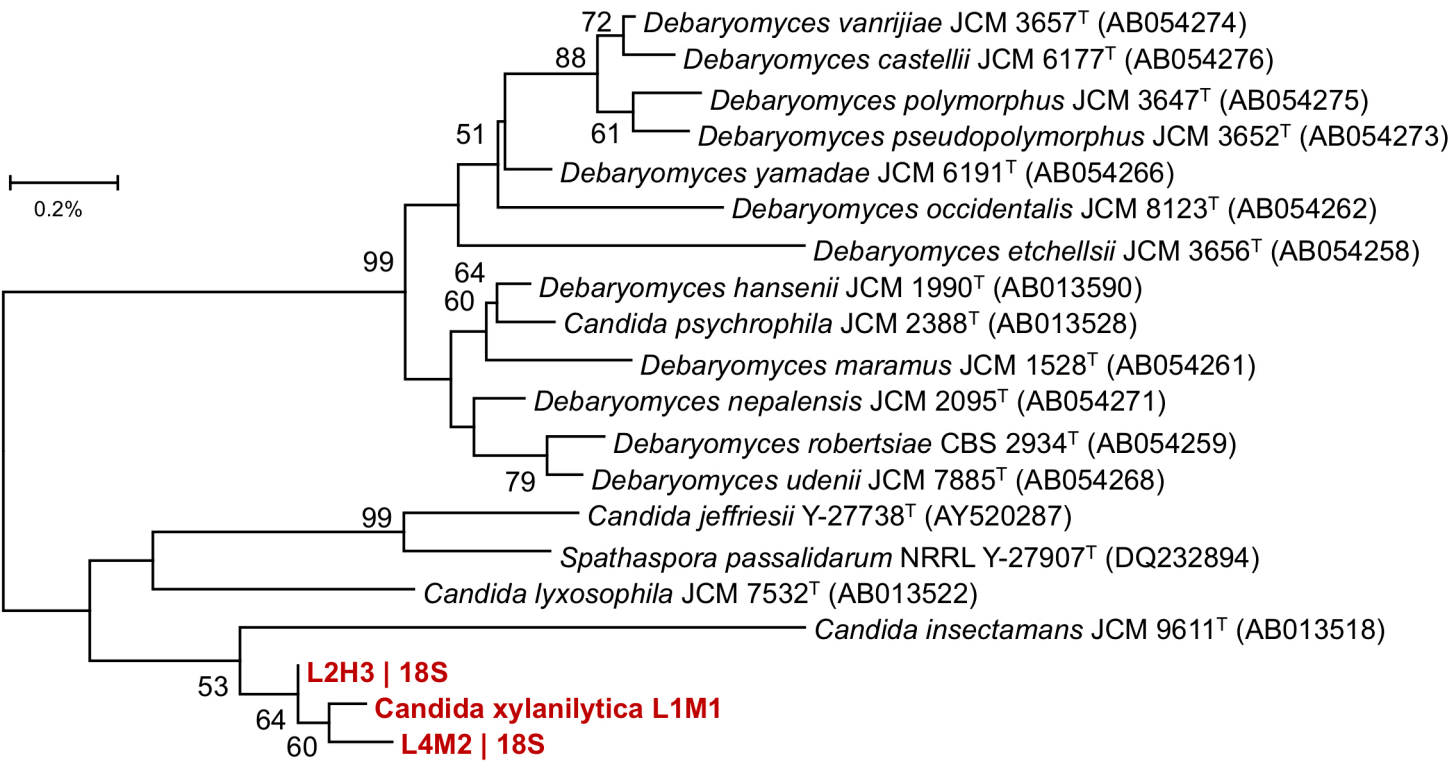

Supplement: s1 [file s1]
